# Supplementary material
Source: PubMed Central journal article supplement (PMC3083246)
Supplement: NIHMS283032-supplement-1_si_001.pdf [file NIHMS283032-supplement-1_si_001.pdf]

# **Novel interactions of fluorinated nucleotide derivatives targeting orotidine-5'-monophosphate decarboxylase**

*Melissa Lewis,<sup>1</sup> Maria Elena Meza Avina,<sup>1,7</sup> Lianhu Wei,<sup>1</sup> Ian E. Crandall,<sup>5</sup> Angelica Mara Bello,<sup>1</sup> Ewa Poduch,<sup>1</sup> Yan Liu,<sup>4</sup> Christopher J. Paige,<sup>2,3</sup> Kevin C. Kain,<sup>6</sup> Emil F. Pai,<sup>1,2,4</sup> and  
Lakshmi P. Kotra<sup>1,5,6,7\*</sup>*

<sup>1</sup>Center for Molecular Design and Preformulations, and Division of Cellular and Molecular Biology, Toronto General Research Institute, University Health Network, Toronto, ON, M5G 1L7 Canada, <sup>2</sup>Department of Medical Biophysics, Ontario Cancer Institute, Princess Margaret Hospital, 620 University Avenue, Toronto, ON, M5G 2M9, Canada, <sup>3</sup>Department of Immunology, University of Toronto, Toronto, Ontario, Canada, <sup>4</sup>Departments of Biochemistry and Molecular Genetics, University of Toronto, 1 King's College Circle, Toronto, ON, Canada, <sup>5</sup>Departments of Pharmaceutical Sciences and Chemistry, University of Toronto, <sup>6</sup>McLaughlin Center for Molecular Medicine, University of Toronto, and <sup>7</sup>Department of Chemistry & Biochemistry, The University of North Carolina at Greensboro, Greensboro, NC 27412, USA.

**RECEIVED DATE (to be automatically inserted)**

---

\*Corresponding Author, Mailing address: #5-356, Toronto Medical Discoveries Tower/MaRS Center, 101 College Street, Toronto, Ontario, Canada M5G 1L7. Tel. (416) 581-7601, E-mail: [lkotra@uhnres.utoronto.ca](mailto:lkotra@uhnres.utoronto.ca)

### Purity Analyses.

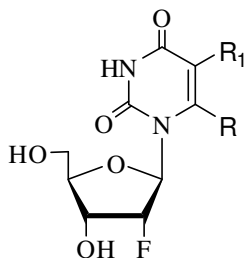

- 27** R= I, R<sub>1</sub> = H  
**28** R= N<sub>3</sub>, R<sub>1</sub> = H  
**29** R= CN, R<sub>1</sub> = H  
**30** R= CONH<sub>2</sub>, R<sub>1</sub> = H  
**31** R= H, R<sub>1</sub> = CN  
**32** R= CO<sub>2</sub>Et, R<sub>1</sub> = H  
**38** R= NH<sub>2</sub>, R<sub>1</sub> = H

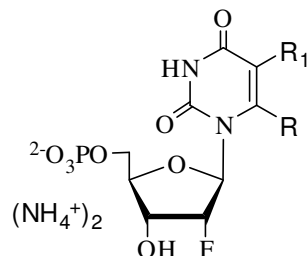

- 33** R= I, R<sub>1</sub> = H  
**34** R= N<sub>3</sub>, R<sub>1</sub> = H  
**35** R= CN, R<sub>1</sub> = H  
**36** R= CONH<sub>2</sub>, R<sub>1</sub> = H  
**37** R= H, R<sub>1</sub> = CN

Purity analysis for compounds **29-32** was evaluated on a Waters HPLC system equipped with a photodiode array detector using a Symmetry C18 5 $\mu$ m 4.6mm x 100 mm column. The methods used were of two types. Method A: 15% MeOH in H<sub>2</sub>O (1mL/min, isocratic) and Method B: 5% MeOH in CH<sub>3</sub>CN (0.5mL/min, isocratic). Purity analysis for compounds **27, 28, 33, 34,** and **38** was evaluated on a Waters<sup>TM</sup> LC/MS system equipped with a photodiode array detector using an XBridge C18 5 $\mu$ m 4.6mm x 150 mm column. The methods used were of three types. Method C: 10% MeOH in H<sub>2</sub>O (1mL/min, isocratic), Method D: 20% MeOH in H<sub>2</sub>O (1mL/min, isocratic), Method E: 3% AcOH in H<sub>2</sub>O (1mL/min, isocratic) and Method F: 20% CH<sub>3</sub>CN (with 0.05% TFA) in H<sub>2</sub>O (1mL/min, isocratic). Table 1 below shows the purity data obtained through HPLC.

Elemental analyses (C, H, and N) of compounds **35-37** were performed by the Analytical lab for Environmental Science Research and Training of the University of Toronto and Perkin Elmer Corporation. The results obtained were within 0.4% of the calculated values.

**Table 1.** Purity data for compounds **27-34** and **38**.

| <b>Compounds</b> | <b>Methods</b> | <b>Average % purity</b> |
|------------------|----------------|-------------------------|
| <b>27</b>        | C and F        | 96%                     |
| <b>28</b>        | C and D        | 98%                     |
| <b>29</b>        | A and B        | 98%                     |
| <b>30</b>        | A and B        | 98%                     |
| <b>31</b>        | A and B        | 98%                     |
| <b>32</b>        | A and B        | 98%                     |
| <b>33</b>        | C and F        | 93%                     |
| <b>34</b>        | E and F        | 96%                     |
| <b>38</b>        | E and D        | 98%                     |

**Elemental analyses data for 35-37.**

**6-Cyano-2'-deoxy-2'-fluoro-β-D-uridine-5'-O-monophosphate (35).** Empirical formula: C<sub>10</sub>H<sub>11</sub>FN<sub>3</sub>O<sub>8</sub>P·2.7 NH<sub>3</sub>·3.85H<sub>2</sub>O: Calcd. C: 25.75, H: 5.79, N: 17.11. Found: C: 25.72, H: 5.76, N: 17.11

**6-Amido-2'-deoxy-2'-fluoro-β-D-uridine-5'-O-monophosphate (36).** Empirical formula: C<sub>10</sub>H<sub>13</sub>FN<sub>3</sub>O<sub>9</sub>P·1.95NH<sub>3</sub>·1.05H<sub>3</sub>PO<sub>4</sub>: Calcd: C: 23.77, H: 4.39, N: 13.72. Found: C: 23.72, H: 4.21, N: 13.90.

**5-Cyano-2'-deoxy-2'-fluoro-β-D-uridine-5'-O-monophosphate (37).** Empirical formula: C<sub>10</sub>H<sub>11</sub>FN<sub>3</sub>O<sub>8</sub>P·2.7NH<sub>3</sub>·3.85 H<sub>2</sub>O: Calcd: C: 25.75, H: 5.79, N: 17.11. Found: C: 25.72, H: 5.76, N: 17.11.
